# Supplementary material
Source: publisher figshare collection journal article supplement (https://sage.figshare.com/ndownloader/files/14812898)
Supplement: Supplementary file 1 [file 14812898]

## Sheet: TableS1.1
	Table S2. Mean psychiatric healthcare utilization and related cost per patient by age group during the follow-up
	Age group	1 - 5 years		6 - 12 years		13 - 17 years		18 - 25 years
		Follow-up		Follow-up		Follow-up		Follow-up
		Year 1	Year 5	Year 1	Year 5	Year 1	Year 5	Year 1	Year 5
	Psychiatric hospitalization
	Number *	0.06 ± 0.33	0.02 ± 0.16	0.10 ± 0.36	0.03 ± 0.20 †	0.32 ± 0.77	0.06 ± 0.26 †	0.42 ± 0.98	0.19 ± 0.75 †
	Cost	2,948 ± 22,311 $	1,264 ± 15,754 $ †	7,711 ± 40,400 $	4,689 ± 48,264 $ †	27,096 ± 94,311 $	5,521 ± 48,792 $ †	21,647 ± 54,150 $	14,147 ± 58,116 $ †
	Psychiatric medical visit
	(GP and specialist)
	Number	6.6 ± 12.5	1.8 ± 4.4 †	10.0 ± 20.5	2.3 ± 4.0 †	7.4 ± 8.7	2.2 ± 3.2 †	5.4 ± 8.6	2.6 ± 4.7 †
	Cost	452 ± 645 $	158 ± 383 $ †	628 ± 934 $	230 ± 545 $ †	1,209 ± 1,959 $	294 ± 830 $ †	1,063 ± 2,277 $	410 ± 1,031 $ †
	Psychoactive drug dispensation
	Number	2.8 ± 9.2	8.8 ± 20.1 †	14.7 ± 25.8	24.5 ± 51.8 †	20.0 ± 33.7	43.2 ± 69.3 †	57.0 ± 144.6	64.4 ± 88.8
	Cost	77 ± 272 $	270 ± 678 $ †	473 ± 916 $	722 ± 1,089 $	861 ± 1,102 $	1,264 ± 1,631 $ †	1,639 ± 2,356 $	2,059 ± 2,766 $
	Class
	Anticonvulsants
	Number	0.6 ± 4.5	1.3 ± 7.0 †	1.5 ± 5.5	3.7 ± 13.3 †	3.9 ± 9.9	7.6 ± 20.6 †	14.2 ± 36.0	17.4 ± 38.7
	Cost	23 ± 198 $	42 ± 252 $ †	48 ± 206 $	89 ± 334 $ †	130 ± 332 $	190 ± 516 $	284 ± 586 $	394 ± 769 $
	Antipsychotics
	Number	0.6 ± 2.6	2.8 ± 8.9 †	5.1 ± 12.9	8.0 ± 22.0	7.6 ± 19.2	19.0 ± 37.5 †	21.9 ± 68.1	23.1 ± 32.4
	Cost	30 ± 144 $	98 ± 465 $ †	269 ± 722 $	312 ± 682 $	538 ± 921 $	819 ± 1,358 $ †	1,086 ± 1,806 $	1,388 ± 2,337 $
	Antidepressants
	Number	0.1 ± 0.8	0.8 ± 4.0 †	1.0 ± 4.4	2.6 ± 12.1	2.9 ± 6.7	5.9 ± 14.0	7.1 ± 31.3	9.2 ± 22.0
	Cost	2 ± 17 $	14 ± 63 $ †	20 ± 87 $	42 ± 141 $	98 ± 197 $	129 ± 262 $	168 ± 433 $	181 ± 364 $
	Anxiolytics
	Number	0.2 ± 0.9	0.2 ± 2.7	0.6 ± 3.6	0.9 ± 5.4	0.6 ± 3.0	2.1 ± 8.5	3.9 ± 12.3	4.6 ± 14.6
	Cost	3 ± 19 $	4 ± 29 $	13 ± 88 $	11 ± 58 $	6 ± 29 $	17 ± 81 $	34 ± 91 $	37 ± 111 $
	ADHD drugs
	Number	1.2 ± 5.0	3.4 ± 9.6 †	5.1 ± 10.2	6.3 ± 15.9	2.2 ± 5.6	2.9 ± 11.6	1.3 ± 5.4	2.3 ± 12.2
	Cost	19 ± 73 $	112 ± 333 $ †	119 ± 239 $	261 ± 561 $ †	78 ± 213 $	92 ± 329 $	25 ± 96 $	33 ± 143 $
	Lithium
	Number	0	0	0	0.3 ± 5.4	0.1 ± 1.0	1.2 ± 8.8 †	1.1 ± 6.6	0.5 ± 5.9
	Cost	0	0	0	2 ± 32 $	1 ± 7 $	7 ± 50 $ †	8 ± 44 $	3 ± 29 $
	Anticholinergics
	Number	0.004 ± 0.060	0.031 ± 0.534	0.6 ± 3.7	0.8 ± 5.6	1.4 ± 6.1	1.7 ± 7.9	4.9 ± 15.2	3.9 ± 13.5
	Cost	0.03 ± 0.50 $	0.25 ± 4.38 $	4 ± 22 $	5 ± 30 $	10 ± 36 $	11 ± 45 $	33 ± 104 $	23 ± 67 $
	GP: General Practitioner; * Results are shown as the mean ± standard deviation; † Significant difference compared to year 1 of the follow-up.
